# Supplementary material for: A Structural and Dynamic Analysis of the Partially Disordered Polymerase-Binding Domain in RSV Phosphoprotein
Source: MDPI journal article supplement (doi:10.3390/biom11081225), 2021-08-17
Supplement: s1 [file s1]

## Supplementary

**Table S1.** NMR restraints and structural statistics for RSV P<sub>127-163</sub> tetramer.

|                                                       |           |
|-------------------------------------------------------|-----------|
| <b>Number of structures</b>                           | 20        |
| <b>Number of NOE distance restraints per protomer</b> | 629       |
| Unambiguous                                           | 285       |
| Intra-residue                                         | 133       |
| Sequential                                            | 155       |
| Medium range                                          | 56        |
| Inter-molecular                                       | 166       |
| Ambiguous                                             | 166       |
| Inter-molecular                                       | 28Φ, 28Ψ  |
| <b>Number of dihedral angle restraints</b>            |           |
| <b>Violation statistics</b>                           |           |
| Distance violation/structure                          |           |
| Unambiguous                                           |           |
| Viol > 0.5 Å                                          | 0.2 ± 0.9 |
| Viol > 0.3 Å                                          | 10 ± 5    |
| Ambiguous                                             |           |
| Viol > 0.5 Å                                          | 0.2 ± 0.9 |
| Viol > 0.3 Å                                          | 6.0 ± 2.4 |
| Dihedral angle violation/structure                    |           |
| >5°                                                   | 0         |
| RMS of dihedral angle violation                       | 0°        |
| <b>RMS deviation from ideal covalent geometry</b>     |           |
| Number of close contacts                              | 153       |
| Bond angles                                           | 1.0°      |
| Bond lengths                                          | 0.008 Å   |
| <b>Rmsd</b>                                           |           |
| Backbone, all residues                                | 1.39 Å    |
| Heavy atoms all residues                              | 1.73 Å    |
| Backbone, ordered residues                            | 0.4 Å     |
| Heavy atoms, ordered residues                         | 0.8 Å     |
| <b>Ramachandran plot summary from Procheck</b>        |           |
| Most favored regions                                  | 99 %      |
| Additionally allowed regions                          | 1 %       |
| Generously allowed regions                            | 0 %       |
| Disallowed regions                                    | 0 %       |
